# Supplementary material for: Comparative genomics of the white-rot fungi, Phanerochaete carnosa and P. chrysosporium, to elucidate the genetic basis of the distinct wood types they colonize
Source: PubMed Central journal article supplement (PMC3463431; doi:10.1186/1471-2164-13-444), 2012-09-02
Supplement: 1471-2164-13-444-S1.pdf [file 1471-2164-13-444-S1.pdf]

## Supplemental tables

Table S1. *P. carnosus* sequencing summary.

| Library      | Library_Type | Raw_Reads | Raw_Bases     | Trimmed_Bases | Assem_Reads | Assem_Bases   | Coverage | Insert | Insert_StdDev |
|--------------|--------------|-----------|---------------|---------------|-------------|---------------|----------|--------|---------------|
| GCXT         | 454          | 3,250,968 | 1,314,960,768 | 1,313,748,704 | 3,127,914   | 1,260,244,475 | 29.05x   | NA     |               |
| GUPU         | 454          | 1,000,756 | 405,503,493   | 404,997,892   | 974,429     | 396,177,643   | 9.13x    | NA     |               |
| GHOC         | 454PE        | 1,312,895 | 327,864,098   | 295,946,764   | 1,234,416   | 287,653,280   | 6.63x    | 3560   | 889           |
| GCNX         | 454PE        | 572,197   | 177,323,735   | 162,914,495   | 543,132     | 158,464,822   | 3.65x    | 14475  | 3618          |
| GFYP         | 454PE        | 199,868   | 66,367,587    | 60,638,155    | 191,898     | 59,079,037    | 1.36x    | 6149   | 1537          |
| GFYS         | 454PE        | 110,638   | 47,728,082    | 43,425,668    | 106,417     | 42,060,278    | 0.97x    | 5218   | 1729          |
| GATS         | SANGER       | 190,290   | 167,187,218   | 147,358,060   | 182,501     | 140,250,273   | 3.23x    | 2918   | 729           |
| GUPW         | SANGER       | 13,332    | 11,769,040    | 9,601,641     | 12,434      | 8,723,897     | 0.20x    | 39372  | 9843          |
| NODE         | SOLEXA       | 192,038   | 171,143,486   | 171,141,890   | 188,005     | 168,072,328   | 3.87x    | NA     |               |
| <b>TOTAL</b> |              | 6,842,982 | 2,689,847,507 | 2,609,773,269 | 6,561,146   | 2,520,726,033 | 58.10x   |        |               |

Table S2. *P. carnosa* assembly summary.

|                                |          |
|--------------------------------|----------|
| Genome Assembly size           | 46.29Mb  |
| Sequencing read coverage depth | 58.10    |
| # of contigs                   | 2272     |
| # of scaffolds                 | 1137     |
| Scaffold N50/ L50              | 6/3.53Mb |

Table S3. Gene model support by different lines of evidence.

|                                  | <i>P. carnosa</i> | <i>P. chrysosporium</i> |
|----------------------------------|-------------------|-------------------------|
| # of models                      | 13,937            | 10,048                  |
| % complete (start + stop)        | 12,449 (89%)      | 8352 (83%)              |
| % supported by nr homolog        | 10,619 (76%)      | ND                      |
| % supported by Swissprot homolog | 7736 (56%)        | 6621 (66%)              |
| % with Pfam domain               | 6449 (46%)        | 4769 (47%)              |
| % with EST support (>25%)        | 12062(87%)        | ND                      |
| % with full-length EST support   | 8823(63%)         | ND                      |
| Gene length (nt)                 | 1448              | 1363                    |
| Transcript length (nt)           | 1190              | 1116                    |
| Protein length (aa)              | 313               | 372                     |
| Exon length (nt)                 | 159               | 138                     |
| Intron length (nt)               | 57                | 55                      |
| # exons / gene                   | 4                 | 5                       |
| # single exon genes              | 2695              | 1202                    |

Table S4. Summary of *P.carnosus* annotations.

|                                                             |              |             |
|-------------------------------------------------------------|--------------|-------------|
| <b>KEGG pathway</b>                                         |              |             |
| Amino Acid Metabolism                                       | 594          | 4%          |
| Biosynthesis of Polyketides and Nonribosomal Peptides       | 118          | 1%          |
| Biosynthesis of Secondary Metabolites                       | 375          | 3%          |
| Carbohydrate Metabolism                                     | 588          | 4%          |
| Energy Metabolism                                           | 134          | 1%          |
| Glycan Biosynthesis and Metabolism                          | 195          | 1%          |
| Lipid Metabolism                                            | 568          | 4%          |
| Metabolism of Cofactors and Vitamins                        | 466          | 3%          |
| Metabolism of Other Amino Acids                             | 145          | 1%          |
| Nucleotide Metabolism                                       | 268          | 2%          |
| Biosynthetic pathways                                       | 402          | 3%          |
| Xenobiotics Biodegradation and Metabolism                   | 456          | 3%          |
| <b>Total KEGG annotated genes</b>                           | <b>4309</b>  | <b>31%</b>  |
| <b>KOG Classification</b>                                   |              |             |
| Cell wall/membrane/envelope biogenesis                      | 95           | 1%          |
| Cell motility                                               | 5            | 0%          |
| Posttranslational modification                              | 700          | 5%          |
| Signal transduction mechanisms                              | 652          | 5%          |
| Intracellular trafficking, secretion, & vesicular transport | 319          | 2%          |
| Defense mechanisms                                          | 132          | 1%          |
| Extracellular structures                                    | 69           | 0%          |
| Nuclear structure                                           | 93           | 1%          |
| Cytoskeleton                                                | 219          | 2%          |
| RNA processing and modification                             | 382          | 3%          |
| Chromatin structure and dynamics                            | 184          | 1%          |
| Translation, ribosomal structure and biogenesis             | 346          | 2%          |
| Transcription                                               | 396          | 3%          |
| Replication, recombination and repair                       | 231          | 2%          |
| Energy production and conversion                            | 393          | 3%          |
| Cell cycle control, cell division, chromosome partitioning  | 219          | 2%          |
| Amino acid transport and metabolism                         | 252          | 2%          |
| Nucleotide transport and metabolism                         | 84           | 1%          |
| Carbohydrate transport and metabolism                       | 343          | 2%          |
| Coenzyme transport and metabolism                           | 101          | 1%          |
| Lipid transport and metabolism                              | 362          | 3%          |
| Inorganic ion transport and metabolism                      | 157          | 1%          |
| Secondary metabolism                                        | 490          | 4%          |
| <b>Total KOG annotated genes</b>                            | <b>6224</b>  | <b>45%</b>  |
| <b>GO Term</b>                                              |              |             |
| Biological process                                          | 3731         | 27%         |
| Cellular component                                          | 1972         | 14%         |
| Molecular function                                          | 5748         | 41%         |
| <b>Total GO annotated genes</b>                             | <b>6100*</b> | <b>44%*</b> |

\*In GO, the same gene can be assigned to multiple categories.

Table S5. Top 50 PFAM domains in *Phanerochaete* genomes.

| PfamId  | Phchr | Phaca | Other 31 Basidiomycetes* |     |     | Pfam Description |
|---------|-------|-------|--------------------------|-----|-----|------------------|
|         |       |       | Avg                      | Max | Min |                  |
| PF00067 | 113   | 207   | 91                       | 204 | 4   | p450             |
| PF07690 | 141   | 172   | 148                      | 427 | 22  | MFS_1            |
| PF00400 | 109   | 202   | 113                      | 197 | 49  | WD40             |
| PF00069 | 106   | 114   | 104                      | 152 | 56  | Pkinase          |
| PF00106 | 84    | 77    | 82                       | 189 | 14  | adh_short        |
| PF00646 | 70    | 86    | 74                       | 199 | 7   | F-box            |
| PF00271 | 59    | 82    | 80                       | 158 | 32  | Helicase C       |
| PF00248 | 53    | 69    | 36                       | 72  | 9   | Aldo_ket_red     |
| PF00026 | 52    | 68    | 24                       | 51  | 2   | Asp              |
| PF01370 | 50    | 59    | 37                       | 79  | 11  | Epimerase        |
| PF00076 | 50    | 55    | 56                       | 79  | 19  | RRM_1            |
| PF00107 | 52    | 50    | 40                       | 97  | 11  | ADH_zinc_N       |
| PF00005 | 50    | 48    | 38                       | 64  | 17  | ABC_tran         |
| PF00501 | 30    | 64    | 25                       | 76  | 8   | AMP-binding      |
| PF00172 | 35    | 56    | 68                       | 244 | 5   | Zn_clus          |
| PF04082 | 36    | 52    | 45                       | 198 | 2   | Fungal_trans     |
| PF05199 | 32    | 54    | 20                       | 53  | 1   | GMC_oxred_C      |
| PF08240 | 47    | 38    | 40                       | 112 | 12  | ADH_N            |
| PF00096 | 35    | 48    | 51                       | 112 | 15  | zf-C2H2          |
| PF00004 | 39    | 44    | 37                       | 49  | 17  | AAA              |
| PF02985 | 42    | 41    | 38                       | 49  | 14  | HEAT             |
| PF00732 | 31    | 50    | 19                       | 51  | 2   | GMC_oxred_N      |
| PF00098 | 57    | 23    | 40                       | 166 | 1   | zf-CCHC          |
| PF01494 | 31    | 47    | 28                       | 72  | 3   | FAD_binding_3    |
| PF00270 | 33    | 43    | 46                       | 67  | 14  | DEAD             |
| PF01266 | 35    | 41    | 30                       | 70  | 8   | DAO              |
| PF00385 | 69    | 6     | 6                        | 24  | 1   | Chromo           |
| PF00083 | 39    | 36    | 42                       | 123 | 9   | Sugar_tr         |
| PF00097 | 28    | 47    | 42                       | 102 | 15  | zf-C3HC4         |
| PF00692 | 67    | 3     | 2                        | 15  | 0   | dUTPase          |
| PF07993 | 29    | 39    | 27                       | 68  | 7   | NAD_binding_4    |
| PF00561 | 27    | 39    | 26                       | 56  | 8   | Abhydrolase_1    |
| PF00153 | 34    | 31    | 33                       | 40  | 8   | Mito_carr        |
| PF08477 | 32    | 29    | 31                       | 54  | 4   | Miro             |
| PF08242 | 29    | 31    | 28                       | 68  | 9   | Methyltransf_12  |
| PF01753 | 23    | 37    | 27                       | 129 | 1   | zf-MYND          |
| PF08241 | 29    | 30    | 31                       | 60  | 11  | Methyltransf_11  |
| PF00071 | 30    | 28    | 30                       | 53  | 6   | Ras              |
| PF07719 | 27    | 30    | 28                       | 40  | 15  | TPR_2            |
| PF00734 | 28    | 28    | 8                        | 44  | 0   | CBM_1            |
| PF00583 | 24    | 31    | 23                       | 40  | 6   | Acetyltransf_1   |
| PF02798 | 16    | 37    | 16                       | 56  | 2   | GST_N            |
| PF00023 | 20    | 32    | 29                       | 92  | 12  | Ank              |
| PF08659 | 27    | 23    | 32                       | 95  | 8   | KR               |
| PF00515 | 23    | 27    | 27                       | 36  | 14  | TPR_1            |
| PF00226 | 22    | 27    | 29                       | 50  | 13  | DnaJ             |
| PF00018 | 22    | 25    | 25                       | 36  | 14  | SH3_1            |
| PF00702 | 25    | 22    | 25                       | 38  | 8   | Hydrolase        |
| PF00149 | 19    | 27    | 22                       | 31  | 13  | Metallophos      |

\*Gene counts include predicted gene models.

Table S8. Comparison of the number of CAZymes in wood-decaying basidiomycotina.

|                                            | GH  | GT | PL | CE | Total no. | CBM |
|--------------------------------------------|-----|----|----|----|-----------|-----|
| <i>Phanerochaete_carnosa</i> _HHB-10118-sp | 193 | 74 | 8  | 17 | 292       | 43  |
| <i>Phanerochaete_chrysosporium</i> [5, 6]  | 182 | 66 | 4  | 16 | 268       | 48  |
| <i>Postia_placenta</i> _Mad-698-R [12]     | 143 | 75 | 6  | 10 | 234       | 16  |
| <i>Serpula_lacrymans</i> _S7.3 [17]        | 154 | 63 | 6  | 12 | 235       | 29  |
| <i>Schizophyllum_commune</i> _H4-8 [78]    | 236 | 75 | 16 | 30 | 357       | 30  |
| <i>Coprinopsis_cinerea</i> [79]            | 211 | 72 | 13 | 51 | 347       | 89  |
| Average                                    | 187 | 71 | 9  | 23 | 289       | 43  |

Table S9. CAZymes that showed <60% identity to Phchr orthologs.

| Family | Protein | Identity | E-value   | Putative target in wood component | Heatmap <sup>a</sup> |             |             |             |             |
|--------|---------|----------|-----------|-----------------------------------|----------------------|-------------|-------------|-------------|-------------|
|        |         |          |           |                                   | Y                    | F           | P           | S           | M           |
| GH5    | 183787  | 55.60%   | 1.00E-072 | Cellulose/Hemicellulose           | Light Blue           | Light Blue  | Light Blue  | Light Blue  | Light Blue  |
| GH5    | 168586  | 55.56%   | 3.00E-130 | Cellulose/Hemicellulose           | Dark Blue            | Dark Blue   | Light Green | Light Blue  | Light Blue  |
| GH5    | 253799  | 49.14%   | 3.00E-088 | Cellulose/Hemicellulose           | Light Blue           | Light Blue  | Yellow      | Light Green | Light Green |
| GH5    | 93346   | 44.07%   | 1.00E-020 | Cellulose/Hemicellulose           | Dark Blue            | Dark Blue   | Black       | Dark Blue   | Dark Blue   |
| GH5    | 194761  | 34.23%   | 8.00E-017 | Cellulose/Hemicellulose           |                      |             |             |             |             |
| GH5    | 194783  | 30.63%   | 2.00E-010 | Cellulose/Hemicellulose           |                      |             |             |             |             |
| GH7    | 191400  | 59.40%   | 1.00E-079 | Cellulose                         |                      |             |             |             |             |
| GH7    | 205265  | 55.71%   | 2.00E-079 | Cellulose                         |                      |             |             |             |             |
| GH7    | 258037  | 54.64%   | 6.00E-143 | Cellulose                         |                      |             |             |             |             |
| GH16   | 136813  | 58.68%   | 0.00E+000 | Hemicellulose                     | Light Green          | Light Blue  | Light Blue  | Light Blue  | Light Blue  |
| GH16   | 127529  | 54.17%   | 2.00E-110 | Hemicellulose                     | Light Blue           | Dark Blue   | Dark Blue   | Dark Blue   | Light Blue  |
| GH16   | 153747  | 33.51%   | 8.00E-019 | Hemicellulose                     |                      |             |             |             |             |
| GH23   | 258390  | 42.01%   | 0.38      |                                   |                      |             |             |             |             |
| GH28   | 82797   | 28.32%   | 2.00E-013 | Pectin                            |                      |             |             |             |             |
| GH45   | 258456  | 37.66%   | 3.00E-010 | Cellulose                         |                      |             |             |             |             |
| GH61   | 251219  | 53.41%   | 1.00E-068 | Cellulose                         | Dark Blue            | Light Blue  | Orange      | Light Green | Light Green |
| GH79   | 266539  | 57.41%   | 4.00E-032 | Hemicellulose                     |                      |             |             |             |             |
| GH79   | 266550  | 55.70%   | 2.00E-020 | Hemicellulose                     |                      |             |             |             |             |
| GH79   | 266185  | 53.01%   | 7.00E-020 | Hemicellulose                     |                      |             |             |             |             |
| GH79   | 189750  | 51.26%   | 4.00E-026 | Hemicellulose                     | Light Blue           | Light Blue  | Light Blue  | Light Blue  | Light Blue  |
| GH79   | 266219  | 50.00%   | 7.00E-023 | Hemicellulose                     |                      |             |             |             |             |
| GH79   | 257835  | 28.61%   | 4.00E-021 | Hemicellulose                     |                      |             |             |             |             |
| GH79   | 252537  | 24.53%   | 2.00E-018 | Hemicellulose                     |                      |             |             |             |             |
| GT1    | 210347  | 53.35%   | 3.00E-131 |                                   | Dark Blue            | Light Green | Dark Blue   | Light Blue  | Dark Blue   |
| GT1    | 205009  | 50.57%   | 2.00E-124 |                                   | Dark Blue            | Light Blue  | Dark Blue   | Dark Blue   | Dark Blue   |
| GT1    | 205674  | 49.77%   | 1.00E-118 |                                   |                      |             |             |             |             |
| GT1    | 205698  | 48.05%   | 2.00E-112 |                                   |                      |             |             |             |             |
| GT22   | 180449  | 26.07%   | 1.00E-005 |                                   |                      |             |             |             |             |
| GT22   | 214615  | 25.42%   | 3.00E-005 |                                   |                      |             |             |             |             |
| GT22   | 160814  | 25.00%   | 0.38      |                                   |                      |             |             |             |             |
| GT49   | 187889  | 50.00%   | 4.00E-022 |                                   |                      |             |             |             |             |
| PL14   | 260328  | 37.50%   | 4.00E-044 |                                   | Light Blue           | Light Blue  | Light Blue  | Light Blue  | Light Blue  |
| PL14   | 146440  | 37.16%   | 8.00E-032 |                                   | Light Blue           | Light Blue  | Light Blue  | Light Blue  | Light Blue  |
| PL14   | 260353  | 30.89%   | 6.00E-006 |                                   |                      |             |             |             |             |
| PL14   | 265869  | 29.91%   | 2.00E-006 |                                   |                      |             |             |             |             |
| CE16   | 258413  | 50.00%   | 6.10E-001 | Hemicellulose                     |                      |             |             |             |             |
| CE16   | 255713  | 37.59%   | 8.00E-045 | Hemicellulose                     | Light Blue           | Light Blue  | Light Green | Light Green | Light Blue  |
| CE16   | 195373  | 28.43%   | 1.00E-023 | Hemicellulose                     | Light Blue           | Light Blue  | Light Blue  | Light Blue  | Dark Blue   |
| CE16   | 185435  | 25.93%   | 1.90E-001 | Hemicellulose                     |                      |             |             |             |             |
| CE16   | 255913  | 25.28%   | 5.00E-017 | Hemicellulose                     | Light Blue           | Light Blue  | Light Blue  | Light Blue  | Light Blue  |

<sup>a</sup>Data obtained from MacDonald et al. [10]. Heat map represents the level of gene transcripts as described in Fig. S2

Table S11. Comparison of the number of FOlymes of *P. carnosae* and selected Agaricomycotina.

| Species                                           | FOlyme |      |      |              |        |        |                         |         |         |      |      |  |  |  |  |
|---------------------------------------------------|--------|------|------|--------------|--------|--------|-------------------------|---------|---------|------|------|--|--|--|--|
|                                                   | LO1    | LO2  | LO3  | LDA1         | LDA2   | LDA3   | LDA4                    | LDA5    | LDA6    | LDA7 | LDA8 |  |  |  |  |
| <i>Phanerochaete carnosae</i> <sup>a</sup>        | 0      | 11   | 1    | 4            | 0      | 1      | 0                       | 0       | 1       | 3    |      |  |  |  |  |
| <i>Phanerochaete chrysosporium</i> <sup>a,b</sup> | 16     | 1    | 3    | 0            | 0      | 1      | 1                       | 0       | 1       | 4    | 0    |  |  |  |  |
| <i>Coprinopsis cinerea</i> <sup>b</sup>           | 17     | 1    | 1    | 18           | 0      | 0      | 0                       | 0       | 1       | 2    | 0    |  |  |  |  |
| <i>Schizophyllum commune</i> <sup>b</sup>         | 2      | 0    | 1    | 1            | 0      | 2      | 1                       | 0       | 4       | 4    | 1    |  |  |  |  |
| <i>Postia placenta</i> <sup>b</sup>               | 2      | 0    | 0    | 3            | 0      | 0      | 0                       | 0       | 0       | 1    | 2    |  |  |  |  |
| <b>Reference<sup>c</sup></b>                      | LAC2   | LIG8 | P    | CDH_PAAC7274 | VAOX_P | AAA337 | P2OX_PHXP_95915XP_00291 | AAD2102 | AAB5784 |      |      |  |  |  |  |
|                                                   | PLEOS  | HACH | HACH | 7            | ENSI   | 47     | LGI                     | 3       | 0108    | 5    | 9    |  |  |  |  |

Data from <sup>a</sup>this study; <sup>b</sup>Ohm et al. [78];

<sup>c</sup>Reference genes are Genbank Accessions of genes that have been characterized. *P. carnosae* sequences were annotated to the putative function of the reference protein when the best hits to NCBI represented sequences of interest and the alignment showed at least 30% amino acid identity to the reference protein.

Table S12. Summary of oxidoreductases potentially involved in lignocellulose degradation by *P. carnosus* (Phaca) and *P. chrysosporium* (Phchr).

| Putative Function                     | EC Class  | Phaca<br>(no.) | Phaca ID                                           | Phchr<br>(no.) | Phchr ID                                                                                         | Ref.<br>Gene                        |
|---------------------------------------|-----------|----------------|----------------------------------------------------|----------------|--------------------------------------------------------------------------------------------------|-------------------------------------|
| <b>Peroxide generation</b>            |           |                |                                                    |                |                                                                                                  |                                     |
| Methanol oxidase <sup>a</sup>         | 1.1.3.13  | 4              | 252324,<br>121157,<br>126707,<br>213078            | 3              | 126879,<br>5574,<br>6010                                                                         | ALOX_<br>PICAN                      |
| Aryl alcohol oxidase <sup>a</sup>     | 1.1.3.7   | 4              | 260543,<br>100299,<br>132559,<br>147295            | 3              | 37188,<br>135972,<br>6199                                                                        | AAC72<br>747                        |
| Glucose oxidase <sup>a</sup>          | 1.1.3.4   | 0 / 1          | - / 179599                                         | 0 / 1          | - / 6270                                                                                         | GOX_A<br>SPNG /<br>XP_002<br>910108 |
| Pyranose-2-oxidase                    | 1.1.3.10  | 0              | -                                                  | 1              | 137275                                                                                           |                                     |
| Glyoxal oxidase                       | -         | 1              | 258261                                             | 1              | 11088                                                                                            |                                     |
| Copper radical oxidase                | -         | 5              | 123913,<br>259359,<br>143144,<br>263533,<br>263528 | 6              | 259359,<br>123913,<br>258261,<br>8882,<br>121730,<br>121818                                      |                                     |
| <b>Iron reduction and homeostasis</b> |           |                |                                                    |                |                                                                                                  |                                     |
| Quinone reductase <sup>a</sup>        | 1.6.5.5   | 3              | 254412,<br>114036,<br>141788                       | 4              | 121028,<br>129887,<br>10307,<br>139901                                                           | AF4654<br>06                        |
| Glycoprotein iron<br>reductase        | -         | 3              | 249086,<br>169427,<br>258034                       | 2              | AB236889<br>AB236890                                                                             |                                     |
| Cellobiose dehydrogenase              | 1.1.99.18 | 1              | 259608                                             | 1              | 11098                                                                                            |                                     |
| Iron ferroxidase                      | 1.16.3.1  | 1              | 141262                                             | 1              | 26890                                                                                            |                                     |
| <b>Lignin modification</b>            |           |                |                                                    |                |                                                                                                  |                                     |
| Lignin peroxidase                     | 1.11.1.13 | 4              | 263501,<br>213241,<br>212237,<br>152156            | 10             | 10957,<br>121822,<br>131738,<br>6811, 11110,<br>122202,<br>8895,<br>121806,<br>131707,<br>131709 |                                     |



|                               |           |   |                                                                         |   |                                     |
|-------------------------------|-----------|---|-------------------------------------------------------------------------|---|-------------------------------------|
| Mn peroxidase                 | 1.11.1.16 | 7 | 262882,<br>256980,<br>94399,<br>256984,<br>256997,<br>256991,<br>144982 | 5 | 140708,<br>3589, 878,<br>8191, 4636 |
| Low redox peroxidase          | 1.11.1.7  |   |                                                                         |   |                                     |
| Chloroperoxidase <sup>b</sup> | 1.11.1.10 | 3 | 263009,<br>249438,<br>254678                                            | 1 | 1710                                |
| Laccase                       | 1.10.3.2  | 0 | -                                                                       | 0 | -                                   |

<sup>a</sup>best hit and  $\geq 30\%$  amino acid identity with reference gene; <sup>b</sup>contains chloroperoxidase Interpro domain.

Reference genes are Genbank Accessions of genes that have been characterized. *P. carnosus* sequences were annotated to the putative function of the reference protein when the best hits to NCBI represented sequences of interest and the alignment showed at least 30% amino acid identity to the reference protein.

Table S13. Tandem duplication of P450 genes in basidiomycete genomes.

| Genome origin                                   | P450 genes       | Tandemly duplicated genes | Tandem duplication sites | Duplicated genes (%) |
|-------------------------------------------------|------------------|---------------------------|--------------------------|----------------------|
| <i>Phanerochaete carnosae</i> HHB-10118-sp      | 244              | 80                        | 38                       | 33                   |
| <i>Phanerochaete chrysosporium</i> RP-78 [5, 6] | 131 <sup>a</sup> | 23                        | 15                       | 18                   |
| <i>Postia placenta</i> MAD-698 [12]             | 263              | 59                        | 24                       | 22                   |
| <i>Serpula lacrymans</i> S 7.3 [17]             | 136              | 37                        | 16                       | 27                   |
| <i>Schizophyllum commune</i> H4-8 [78]          | 106              | 31                        | 14                       | 29                   |
| <i>Coprinopsis cinerea</i> Okayama 7 [79]       | 122              | 45                        | 16                       | 37                   |
| <i>Laccaria bicolor</i> S238N-H70 [80]          | 69               | 23                        | 15                       | 33                   |

<sup>a</sup>Number of genes which has unique protein ID in *P. chrysosporium* v2.0 database.

Table S14: P450ome classification in *P. carnosus* and its membership comparison with *P. chrysosporium*.

| Clan    | Family  | Sub-family | <i>P. chrysosporium</i> |           | <i>P. carnosus</i> |            |    |
|---------|---------|------------|-------------------------|-----------|--------------------|------------|----|
|         |         |            | No. of P450s            |           | No. of P450s       |            |    |
|         |         |            | Family                  | Clan      | Family             | Clan       |    |
| CYP51   | CYP51   | F          | 1                       | <b>4</b>  | 2                  | <b>5</b>   |    |
|         | CYP5025 | NS         |                         |           | 1                  |            |    |
|         | CYP5156 | A          | 2                       |           | 1                  |            |    |
|         | CYP5157 | A          | 1                       |           | 1                  |            |    |
| CYP52   | CYP63   | A          | 4                       | <b>24</b> | 7                  | <b>32</b>  |    |
|         |         | B          | 1                       |           | 1                  |            |    |
|         |         | C          | 2                       |           | 1                  |            |    |
|         |         | CYP5137    | A                       |           | 2                  |            | 4  |
|         | CYP5141 | A          | 4                       |           | 6                  |            |    |
|         |         | B          | 1                       |           |                    |            |    |
|         |         | C          | 1                       |           | 1                  |            |    |
|         |         | D          | 1                       |           | 1                  |            |    |
|         | CYP5142 | NS         |                         |           |                    |            | 1  |
|         |         |            | A                       |           | 3                  |            | 1  |
|         |         |            | B                       |           | 1                  |            | 2  |
|         |         |            | C                       |           | 1                  |            | 4  |
|         |         |            | D                       |           | 1                  |            |    |
|         | CYP5151 | E          | 1                       |           | 1                  |            |    |
|         |         |            | A                       |           | 1                  |            | 1  |
|         |         |            | B                       |           |                    |            | 1  |
| CYP53   | CYP53   | C          | 1                       | <b>4</b>  | 6                  | <b>10</b>  |    |
|         |         | NS         |                         |           | 1                  |            |    |
|         | CYP5140 | A          | 1                       |           | 1                  |            |    |
|         | CYP5143 | A          | 2                       |           | 2                  |            |    |
| CYP54   | CYP512  | B          | 5                       | <b>14</b> | 2                  | <b>27</b>  |    |
|         |         | C          | 2                       |           | 9                  |            |    |
|         |         | D          | 1                       |           |                    |            |    |
|         |         | E          | 1                       |           | 1                  |            |    |
|         |         | F          | 1                       |           | 2                  |            |    |
|         |         | G          | 2                       |           | 7                  |            |    |
|         |         | H          | 1                       |           | 5                  |            |    |
|         |         | J          | 1                       |           |                    |            |    |
|         |         | NS         |                         |           | 1                  |            |    |
|         |         | CYP61      | CYP61                   |           | A                  |            | 1  |
| CYP64   | CYP502  | B          | 1                       | <b>61</b> | 1                  | <b>124</b> |    |
|         |         | NS         |                         |           | 1                  |            |    |
|         | CYP5037 | A          | 1                       |           | 1                  |            |    |
|         |         | B          | 3                       |           | 5                  |            |    |
|         |         | C          | 1                       |           | 1                  |            |    |
|         | CYP5144 | NS         |                         |           |                    |            | 1  |
|         |         |            | A                       |           | 15                 |            | 19 |
|         |         |            | B                       |           | 1                  |            | 7  |
|         |         |            | C                       |           | 8                  |            | 16 |
|         |         |            | D                       |           | 5                  |            | 3  |
|         |         |            | E                       |           | 1                  |            | 1  |
|         |         |            | F                       |           | 1                  |            | 5  |
|         |         |            | G                       |           | 1                  |            | 7  |
|         |         |            | H                       |           | 1                  |            | 12 |
| J       |         |            | 1                       | 1         |                    |            |    |
| CYP5145 | A       | 3          | 2                       |           |                    |            |    |
| CYP5146 | A       | 4          | 5                       |           |                    |            |    |

|                        |         |        |            |           |    |            |
|------------------------|---------|--------|------------|-----------|----|------------|
|                        |         | B      | 1          |           | 1  |            |
|                        |         | C      | 1          |           | 9  |            |
|                        | CYP5147 | A      | 4          |           | 6  |            |
|                        |         | B      | 1          |           | 1  |            |
|                        |         | C      | 1          |           |    |            |
|                        | CYP5148 | A      | 2          |           | 3  |            |
|                        |         | B      |            |           | 4  |            |
|                        | CYP5149 | A      | 1          |           | 3  |            |
|                        | CYP5152 | A      | 2          |           | 4  |            |
|                        | CYP5158 | A      | 1          |           | 5  |            |
| CYP67                  | CYP5035 | A      | 7          | <b>18</b> | 6  | <b>22</b>  |
|                        |         | B      | 3          |           | 3  |            |
|                        |         | C      | 1          |           | 5  |            |
|                        |         | D      | 1          |           |    |            |
|                        |         | E      | 1          |           |    |            |
|                        | CYP5036 | A      | 3          |           | 3  |            |
|                        |         | B      | 1          |           |    |            |
|                        |         | C      | 1          |           | 5  |            |
| CYP505                 | CYP505  | D      | 7          | <b>7</b>  | 4  | <b>4</b>   |
| CYP534                 | CYP5138 | A      | 1          | <b>11</b> | 2  | <b>29</b>  |
|                        | CYP5139 | A      | 1          |           | 11 |            |
|                        | CYP5150 | A      | 5          |           | 6  |            |
|                        |         | B      | 1          |           | 4  |            |
|                        |         | C      | 1          |           |    |            |
|                        | CYP5153 | A      |            |           | 1  |            |
|                        | CYP5154 | A      | 1          |           | 3  |            |
|                        |         | NS     |            |           | 1  |            |
|                        | CYP5155 | A      | 1          |           | 1  |            |
| CYP547                 | CYP5136 | A      | 5          | <b>5</b>  | 6  | <b>8</b>   |
|                        |         | NS (2) |            |           | 2  |            |
| UA                     | CYP6001 | C      |            |           | 1  | <b>4</b>   |
|                        |         | NS (3) |            |           | 3  |            |
| <b>Authentic P450s</b> |         |        | <b>149</b> |           |    | <b>266</b> |
| Tentative P450s        |         |        | -          |           |    | 5          |
| Pseudo/doubtful P450s  |         |        | 10         |           |    | 13         |
| Non P450               |         |        | -          |           |    | 1          |
| <b>Total Hits</b>      |         |        | <b>159</b> |           |    | <b>285</b> |

An initial search in the machine annotated *P. carnosus* genome revealed 285 P450 hits. These sequences were subjected to manual annotation based on the presence of the conserved P450 characteristic domains, including the oxygen-binding motif and the heme-binding domain. Initially, 239 gene models that contained both the conserved domains were considered as “Authentic P450s”. One sequence showed no convincing homology to P450 proteins and was therefore grouped as “Non-P450”. Further analysis of the remaining 45 P450 sequences revealed the characteristic P450 signature motifs in 27 gene models which were then grouped under the list of authentic P450s. Taken together, the total authentic P450 count for *P. carnosus* came up to 266. Of the remaining 18 of the 45 sequences, 5 sequences were very short and their flanking genomic DNA sequence quality was not as good (due to errors in genome sequencing) and thus it was not possible to predict the P450 signature motifs. However, the available protein sequences of these 5 P450s showed high homology (>75-83%) to the known P450s; hence we grouped them as “tentative P450s”. The remaining 13 sequences showed either one or no P450 characteristic domains in the existing gene models as well as in manually predicted gene models. These 13 P450s were therefore grouped as “Doubtful P450s or Pseudogenes”. Abbreviations: NS, New-subfamily; UA, unassigned clan.

Table S15. P450s upregulated in wood degrading cultures.

| Protein ID | Clan   | Family  | Heatmap    |            |            |            |            |
|------------|--------|---------|------------|------------|------------|------------|------------|
|            |        |         | Y          | F          | P          | S          | M          |
| 260638     | CYP547 | CYP5136 | Blue       | Yellow     | Yellow     | Yellow     | Yellow     |
| 259665     | CYP52  | CYP5137 | Light Blue | Yellow     | Yellow     | Yellow     | Green      |
| 183109     | CYP53  | CYP53   | Green      | Yellow     | Green      | Green      | Green      |
| 256887     | CYP64  | CYP5152 | Green      | Yellow     | Yellow     | Yellow     | Green      |
| 254221     | CYP64  | CYP5148 | Green      | Yellow     | Green      | Yellow     | Yellow     |
| 206285     | CYP54  | CYP512  | Light Blue | Yellow     | Green      | Green      | Green      |
| 265475     | CYP64  | CYP5152 | Light Blue | Green      | Green      | Green      | Green      |
| 164255     | CYP64  | CYP5158 | Light Blue | Light Blue | Green      | Green      | Green      |
| 246674     | CYP54  | CYP512  | Light Blue | Green      | Green      | Green      | Green      |
| 194437     | CYP64  | CYP5148 | Light Blue | Green      | Light Blue | Green      | Green      |
| 109856     | CYP52  | CYP63   | Light Blue | Green      | Green      | Green      | Green      |
| 262256     | CYP547 | CYP5136 | Blue       | Green      | Green      | Yellow     | Light Blue |
| 265429     | CYP534 | CYP5150 | Blue       | Light Blue | Green      | Light Blue | Green      |
| 253633     | CYP534 | CYP5150 | Light Blue | Light Blue | Green      | Green      | Green      |
| 249950     | CYP534 | CYP5150 | Light Blue | Green      | Green      | Green      | Light Blue |
| 212559     | CYP53  | CYP53   | Light Blue | Green      | Green      | Green      | Light Blue |
| 211048     | CYP52  | CYP5137 | Light Blue | Green      | Green      | Green      | Light Blue |
| 263271     | CYP52  | CYP5141 | Light Blue | Green      | Green      | Green      | Light Blue |
| 211944     | CYP52  | CYP5141 | Light Blue | Green      | Green      | Green      | Light Blue |
| 257741     | CYP67  | CYP5036 | Light Blue | Green      | Green      | Green      | Green      |
| 261326     | CYP52  | CYP5141 | Light Blue | Green      | Light Blue | Light Blue | Light Blue |
| 208499     | CYP64  | CYP5144 | Light Blue | Green      | Light Blue | Light Blue | Light Blue |
| 250554     | CYP534 | CYP5139 | Light Blue | Light Blue | Light Blue | Light Blue | Green      |
| 265238     | CYP64  | CYP5144 | Light Blue | Light Blue | Green      | Light Blue | Light Blue |
| 209385     | CYP64  | CYP5144 | Light Blue | Green      | Blue       | Light Blue | Light Blue |
| 256807     | CYP64  | CYP5144 | Blue       | Light Blue | Light Blue | Green      | Light Blue |
| 253615     | CYP64  | CYP5037 | Light Blue | Light Blue | Light Blue | Green      | Light Blue |
| 207382     | CYP64  | CYP5144 | Light Blue | Light Blue | Green      | Light Blue | Light Blue |

Gene expression data were obtained from MacDonald et al. [10]. Y: YMPG culture, F: balsam fir, P: lodgepole pine, S: white spruce, M: sugar maple. Heat map represents the level of gene transcripts as described in Fig. S2.

Table S16. UPLC peaks corresponding to wood-derived phenolic compounds that were transformed by *P. carnosus* or *P. chrysosporium*.

| Retention time          | Component                             | S. maple |     | Y. birch |     | T. aspen |     | R. spruce |     | W. spruce |     | B. fir |     | R. pine |     |
|-------------------------|---------------------------------------|----------|-----|----------|-----|----------|-----|-----------|-----|-----------|-----|--------|-----|---------|-----|
|                         |                                       | Pca      | Pch | Pca      | Pch | Pca      | Pch | Pca       | Pch | Pca       | Pch | Pca    | Pch | Pca     | Pch |
| <b>Heartwood, 350nm</b> |                                       |          |     |          |     |          |     |           |     |           |     |        |     |         |     |
| 1.81                    | $\rho$ -Coumaric acid                 |          |     |          |     |          |     |           |     | +         |     |        |     |         |     |
| 2.49                    | (-) – Epicatechin gallate             |          |     |          |     |          |     |           |     | ++        | ++  |        | +   |         |     |
| 2.88                    | Benzoic acid                          | ++       | ++  |          |     | ++       | ++  | ++        | ++  |           |     | +      | +   |         | +   |
| 3.35                    | Kaempferol 3-O- $\beta$ -D-glucoside  |          |     |          |     |          |     | ++        | ++  | ++        | ++  |        |     |         |     |
| 3.84                    | Naringin                              |          |     |          |     |          |     |           |     | ++        | ++  |        |     |         |     |
| 4.89                    | Kaempferol 3-O- $\beta$ -L-rhamnoside |          |     |          |     |          |     |           |     |           |     |        |     |         |     |
| 5.31                    | Unidentified                          |          |     |          |     |          |     |           |     |           |     |        |     |         |     |
| 6.77                    | Unidentified                          |          |     |          |     |          |     |           |     |           |     |        |     |         |     |
| 6.93                    | Unidentified                          |          |     |          |     |          |     |           |     |           |     |        |     |         |     |
| 8.32                    | Unidentified                          |          |     |          |     |          |     |           |     |           |     |        |     |         |     |
| 9.24                    | Unidentified                          |          |     |          |     |          |     |           |     |           |     |        |     |         |     |
| <b>Heartwood, 280nm</b> |                                       |          |     |          |     |          |     |           |     |           |     |        |     |         |     |
| 7.91                    | Unidentified                          |          |     |          |     |          |     |           |     |           |     |        |     |         |     |
| <b>Sapwood, 350nm</b>   |                                       |          |     |          |     |          |     |           |     |           |     |        |     |         |     |
| 2.89                    | Benzoic acid                          |          |     |          |     |          |     |           |     |           |     |        |     |         |     |
| 3.5                     | Quercetin 3-O- $\beta$ -L-rhamnoside  |          |     |          |     |          |     |           |     |           |     |        |     |         |     |
| 7.29                    | Luteolin                              |          |     |          |     |          |     |           |     |           |     |        |     |         |     |
| 9.08                    | Unidentified                          |          |     |          |     |          |     |           |     |           |     |        |     |         |     |
| 9.11                    | Kaempferol                            |          |     |          |     |          |     |           |     |           |     |        |     |         |     |
| 9.27                    | Unidentified                          |          |     |          |     |          |     |           |     |           |     |        |     |         |     |
| 9.38                    | Unidentified                          |          |     |          |     |          |     |           |     |           |     |        |     |         |     |
| 9.53                    | Unidentified                          |          |     |          |     |          |     |           |     |           |     |        |     |         |     |
| 9.67                    | Unidentified                          |          |     |          |     |          |     |           |     |           |     |        |     |         |     |
| <b>Sapwood, 280nm</b>   |                                       |          |     |          |     |          |     |           |     |           |     |        |     |         |     |
| 1.62                    | Unidentified                          |          |     |          |     |          |     |           |     |           |     |        |     |         |     |

++: Significantly decreased, +: Detectable decrease, Blank: Not significantly affected or peaks not observed.

Table S17. Assignment of FT-IR peaks decomposed by *P. carnosus* and *P. chrysosporium*.

| Wave number (cm-1)                                         | Peak description                                                                                                                | PCA loading |              |              |              |
|------------------------------------------------------------|---------------------------------------------------------------------------------------------------------------------------------|-------------|--------------|--------------|--------------|
|                                                            |                                                                                                                                 | Aspen H     | Aspen S      | Pine H       | Pine S       |
| <i>Peaks decreased by P. carnosus</i>                      |                                                                                                                                 |             |              |              |              |
| 1700-1550                                                  | Conjugated carbonyl stretches, conjugated and nonconjugated C=C stretches; characteristic of both lignin and carbohydrates [81] |             |              |              | 1622*        |
| 1515-1505                                                  | C1/4C stretching of the aromatic ring (G units)                                                                                 |             | 1522<br>1508 |              | 1518         |
| 1470-1455                                                  | C-H asymmetric deformation in -OCH <sub>3</sub> , CH <sub>2</sub> in pyran ring symmetric scissoring                            |             | 1465         |              |              |
| 1375-1365                                                  | CH bending in cellulose I and cellulose II and hemicellulose                                                                    |             |              | 1384         | 1384*        |
| 1268-1273                                                  | Guaiacyl ring breathing with carbonyl stretching [82]                                                                           |             | 1261         |              |              |
| 1235-1230                                                  | Syringyl ring breathing and C-O stretching in lignin and xylan                                                                  |             | 1229         |              |              |
| 1162-1125                                                  | C-O-C asymmetric stretching in cellulose I and cellulose II                                                                     |             | 1127         |              |              |
| 1128-1110                                                  | Aromatic C-H in-plane deformation (typical for S units), C1/4O stretch                                                          | 1124*       | 1127         |              |              |
| 1128-1110                                                  | Aromatic C-H in-plane deformation (typical for S units), C1/4O stretch                                                          |             |              | 1105         |              |
| 1086-1075                                                  | C-O deformation in secondary alcohols and aliphatic ethers                                                                      |             |              | 1091         |              |
| 1060-1015                                                  | C-O valence vibration mainly from C(3)-O(3)H                                                                                    |             |              | 1062<br>1035 | 1056<br>1030 |
| 1047-1004                                                  | C-O stretching in cellulose I and cellulose II                                                                                  |             |              | 1035         | 1030         |
| 996-985                                                    | C-O valence vibration                                                                                                           | 990*        |              |              |              |
| <i>Additional peaks decreased only by P. chrysosporium</i> |                                                                                                                                 |             |              |              |              |
| 1650-1640                                                  | Water associated with lignin or cellulose                                                                                       | 1644        |              |              |              |
| 1470-1455                                                  | C-H asymmetric deformation in -OCH <sub>3</sub> , CH <sub>2</sub> in pyran ring symmetric scissoring                            |             |              |              | 1477         |
| 1162-1125                                                  | C-O-C asymmetric stretching in cellulose I and cellulose II                                                                     |             |              | 1168         | 1183         |
| 1128-1110                                                  | Aromatic C-H in-plane deformation (typical for S units), C1/4O stretch                                                          |             |              | 1125<br>1114 |              |
| 1060-1015                                                  | C-O valence vibration mainly from C(3)-O(3)H                                                                                    |             | 1060<br>1037 |              |              |
| 1047-1004                                                  | C-O stretching in cellulose I and cellulose II                                                                                  |             |              | 1003         |              |
| 996-985                                                    | C-O valence vibration                                                                                                           |             |              | 985          |              |
|                                                            |                                                                                                                                 |             |              |              | 981          |

\*Peaks representing components decomposed only by *P. carnosus* as shown in Fig. S7(C).  
Peak description not referenced in the table are from Popescu et al. [83]

Table S18. Gradient method of UPLC elution.

| Time    | Flow Rate (mL/min) | % A  | % B  | Curve |
|---------|--------------------|------|------|-------|
| Initial | 0.50               | 95.0 | 5.0  | 0     |
| 1.00    | 0.50               | 85.0 | 15.0 | 6     |
| 8.00    | 0.50               | 80.0 | 20.0 | 6     |
| 10.00   | 0.60               | 50.0 | 50.0 | 6     |
| 12.00   | 0.60               | 20.0 | 80.0 | 6     |
| 13.00   | 0.60               | 95.0 | 5.0  | 6     |

Solvent A: 0.1% Formic Acid

Solvent B: Acetonitrile
