# Supplementary material for: Comparative genomics of the white-rot fungi, Phanerochaete carnosa and P. chrysosporium, to elucidate the genetic basis of the distinct wood types they colonize
Source: PubMed Central journal article supplement (PMC3463431; doi:10.1186/1471-2164-13-444), 2012-09-02
Supplement: 1471-2164-13-444-S3.pdf [file 1471-2164-13-444-S3.pdf]

*P. carnos*

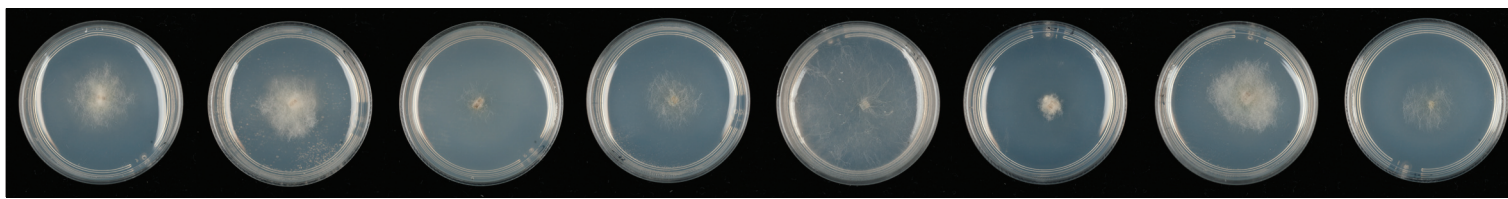

++ ++ ± + + ± ++ +

*P. chrysosporium*

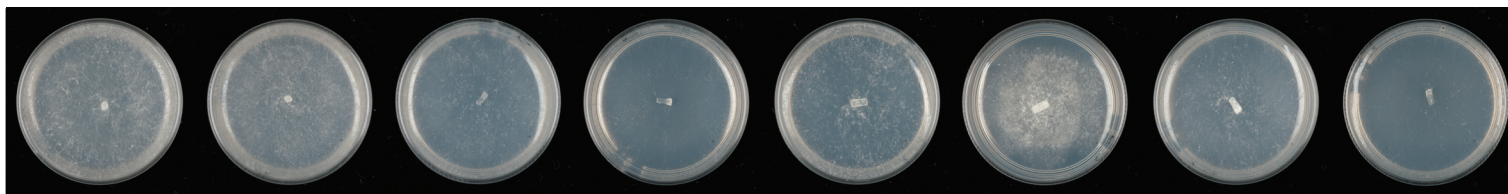

++ ++ ± ± + +++ ± ±

D-glucose  
D-mannose  
D-xylose  
L-rhamnose  
D-galacturonic acid  
Cellobiose  
Maltose  
Sucrose

*P. carnos*

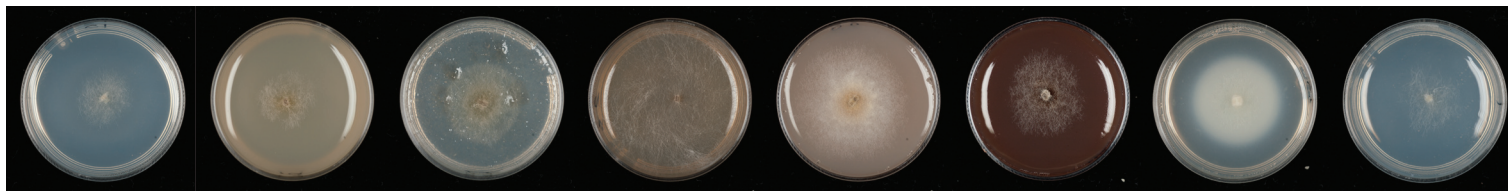

+ + ++ + +++ + +++ ±

*P. chrysosporium*

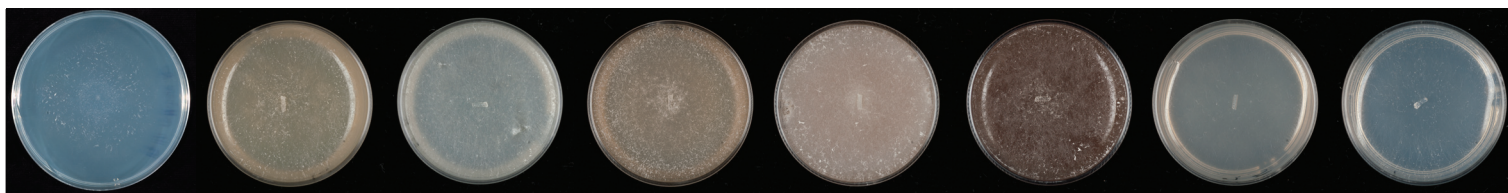

± ++ +++ ++ +++ ++ + -

Raffinose  
Birchwood xylan  
Guar gum  
Apple pectin  
Wheat bran  
Cotton seed pulp  
Casein  
No carbon source

**Fig. S1.** Pictures of *P. carnos* and *P. chrysosporium* grown on various carbon sources.

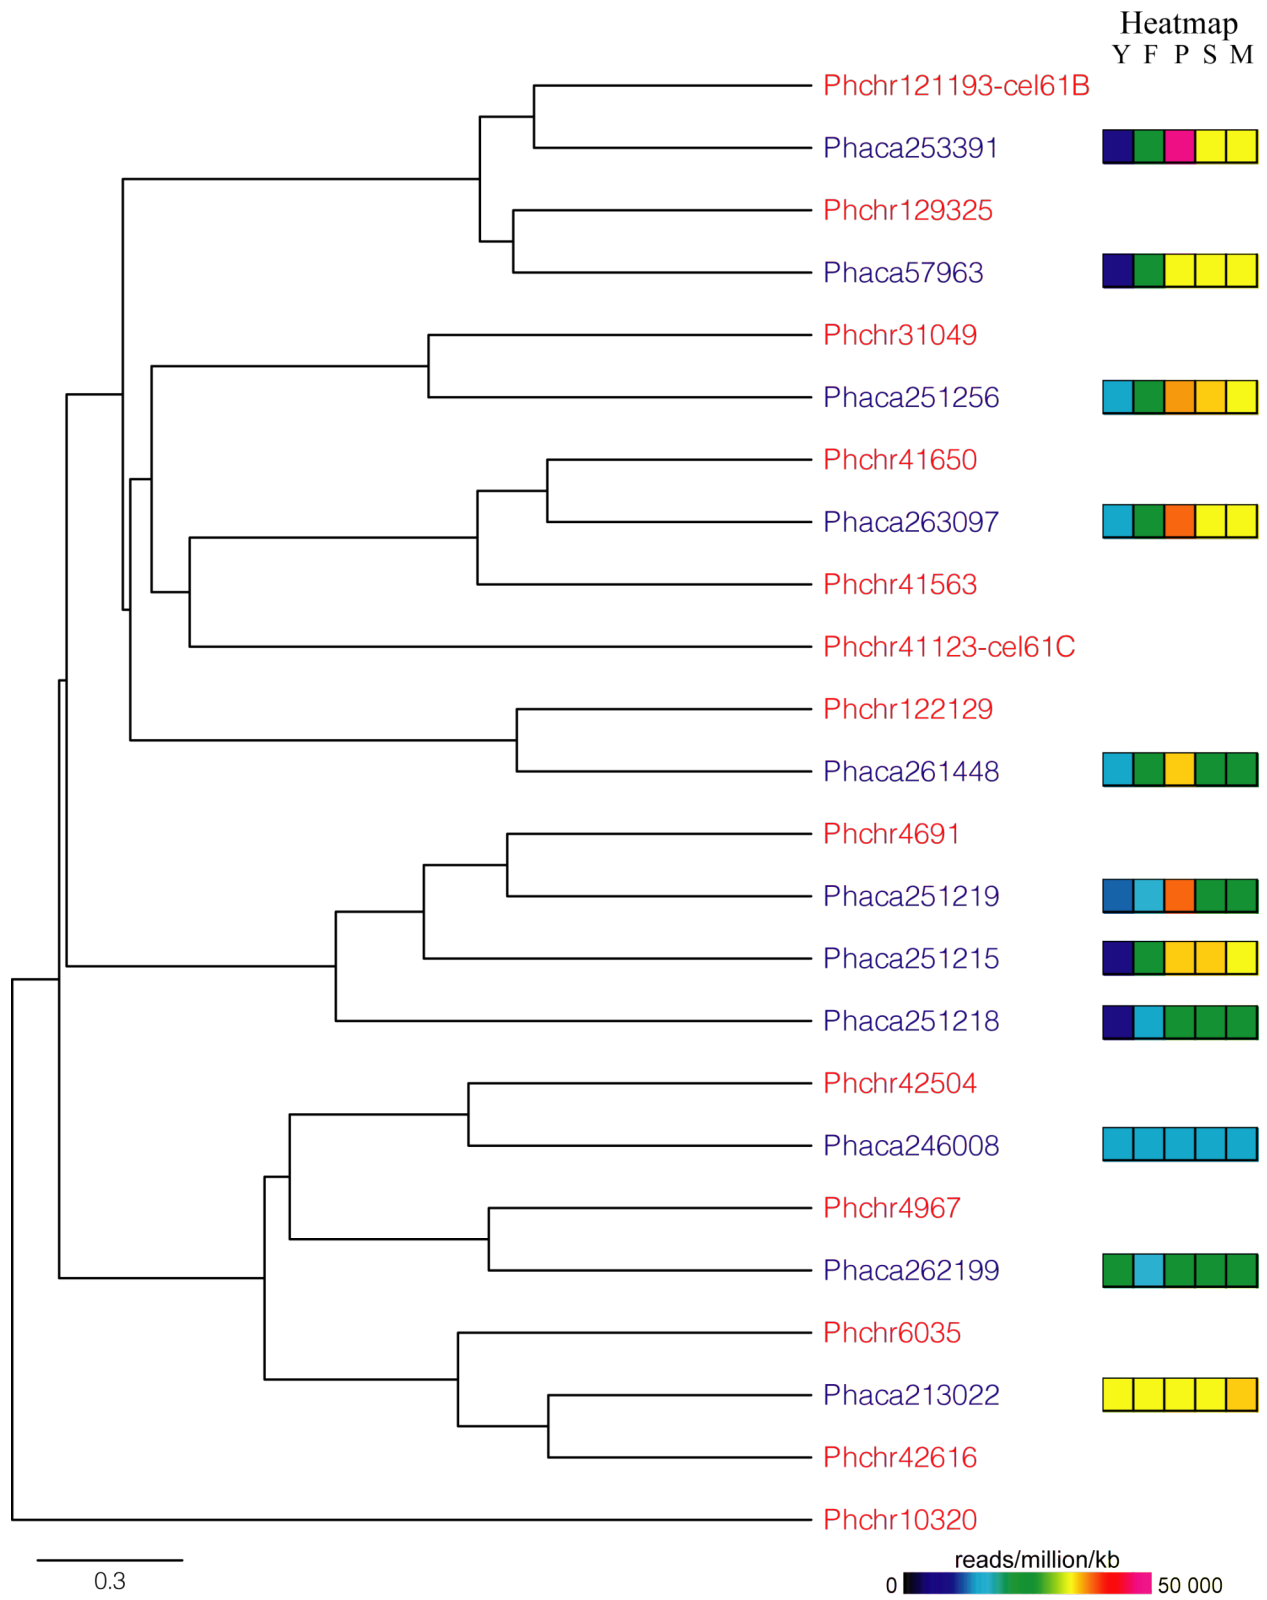

**Fig. S2. Phylogenetic tree of GH61 enzymes from *P. carnosus* and *P. chrysosporium*.**

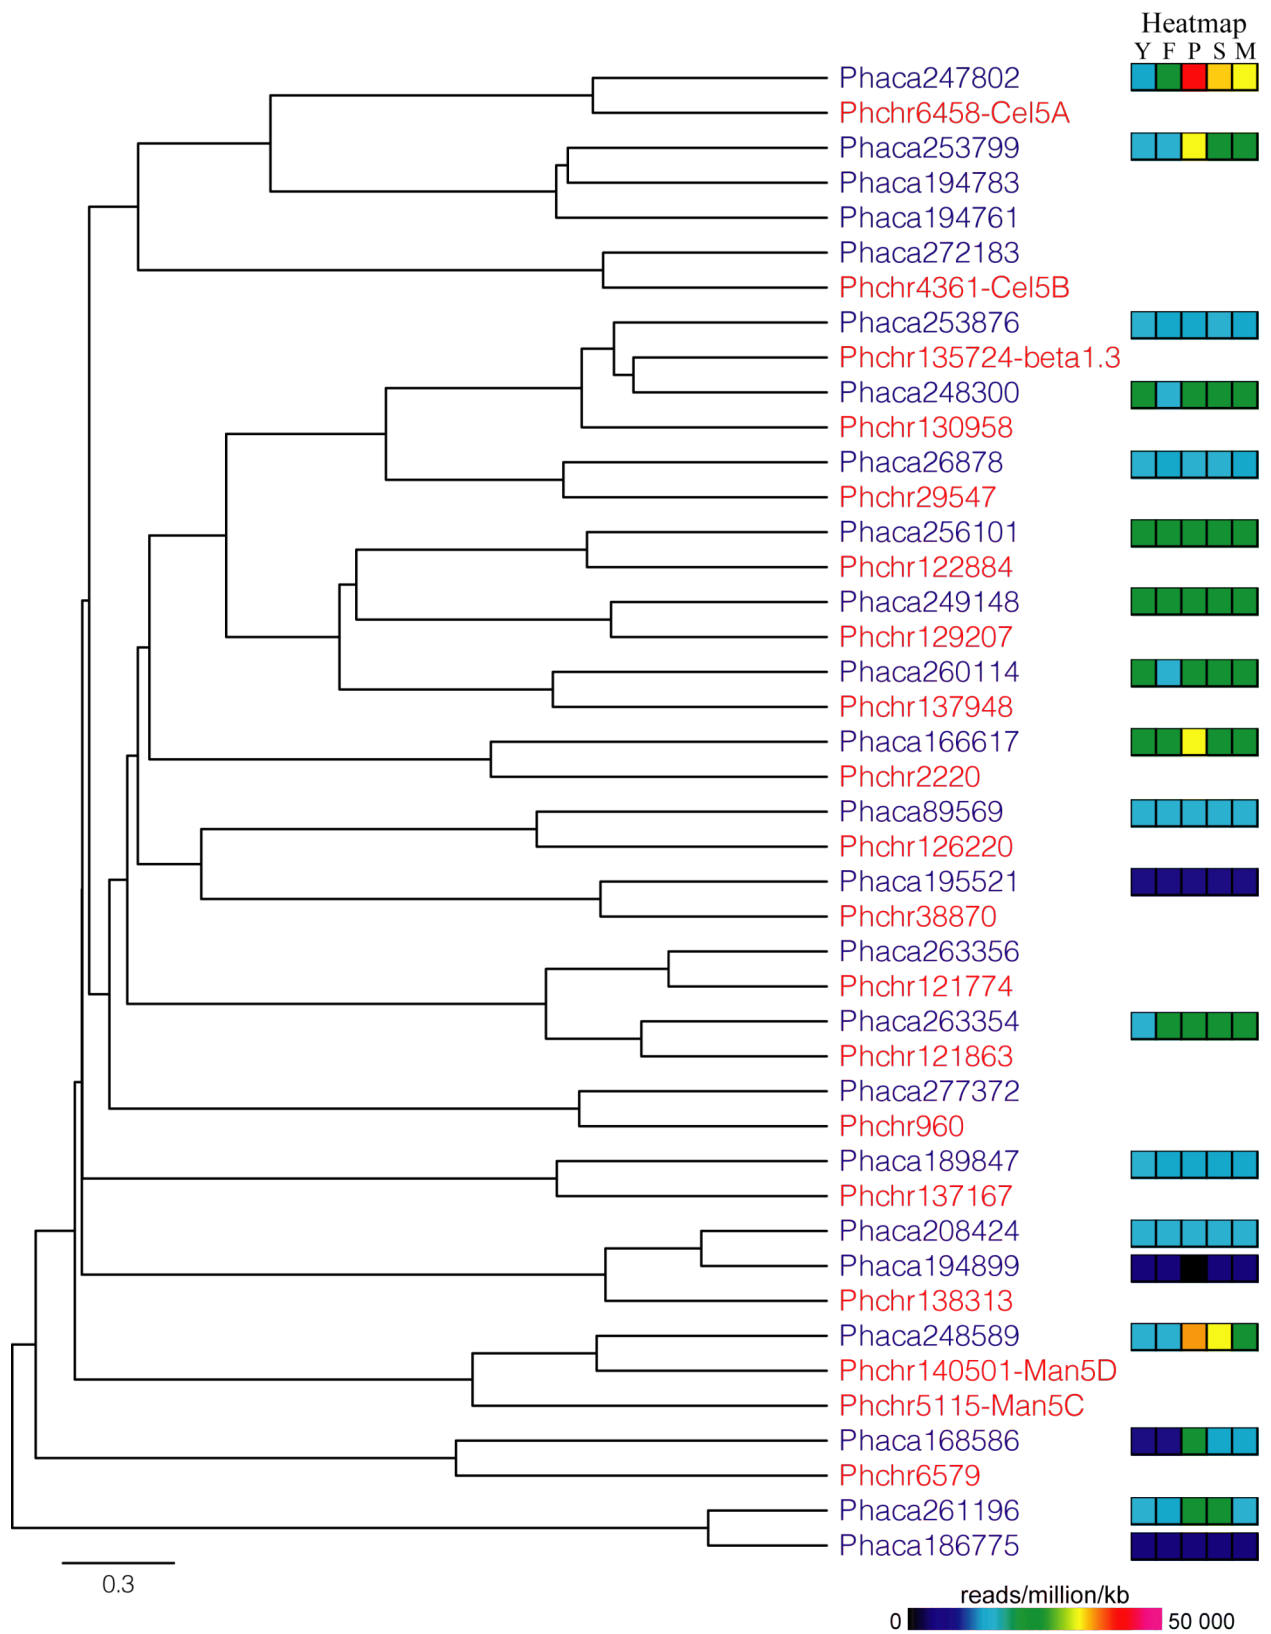

**Fig. S3. Phylogenetic tree of GH5 enzymes in *P. carnosus* and *P. chrysosporium*.**

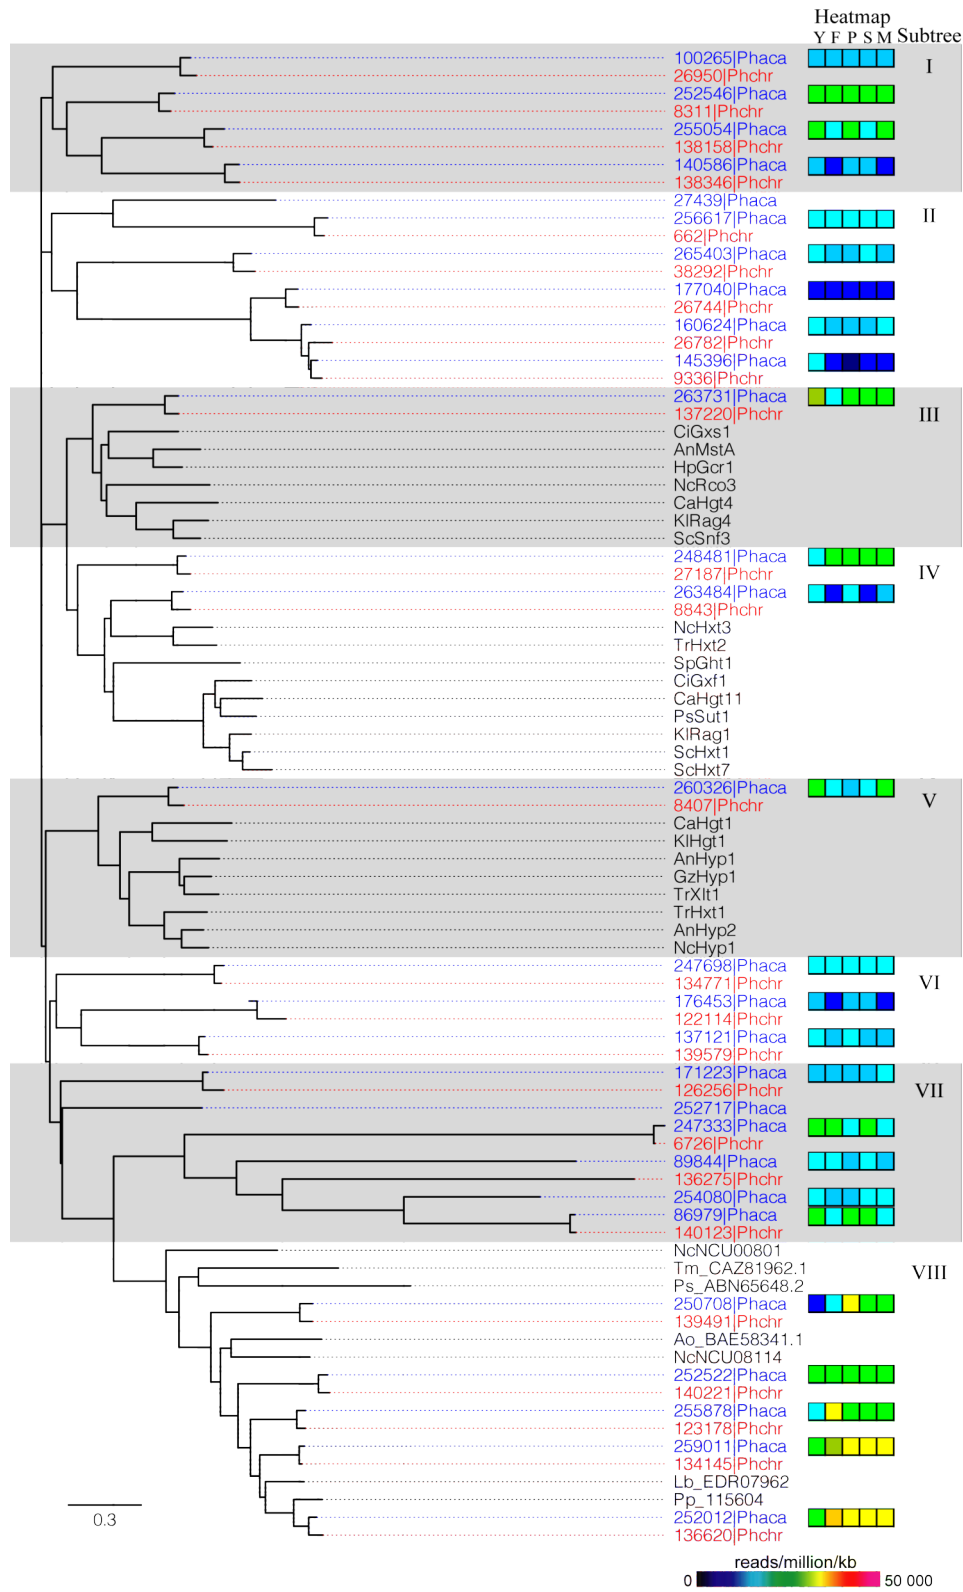

**Fig. S4. Phylogenetic tree of predicted sugar transporters and permeases from genomes of *P. carnosus* and *P. chrysosporium*.**

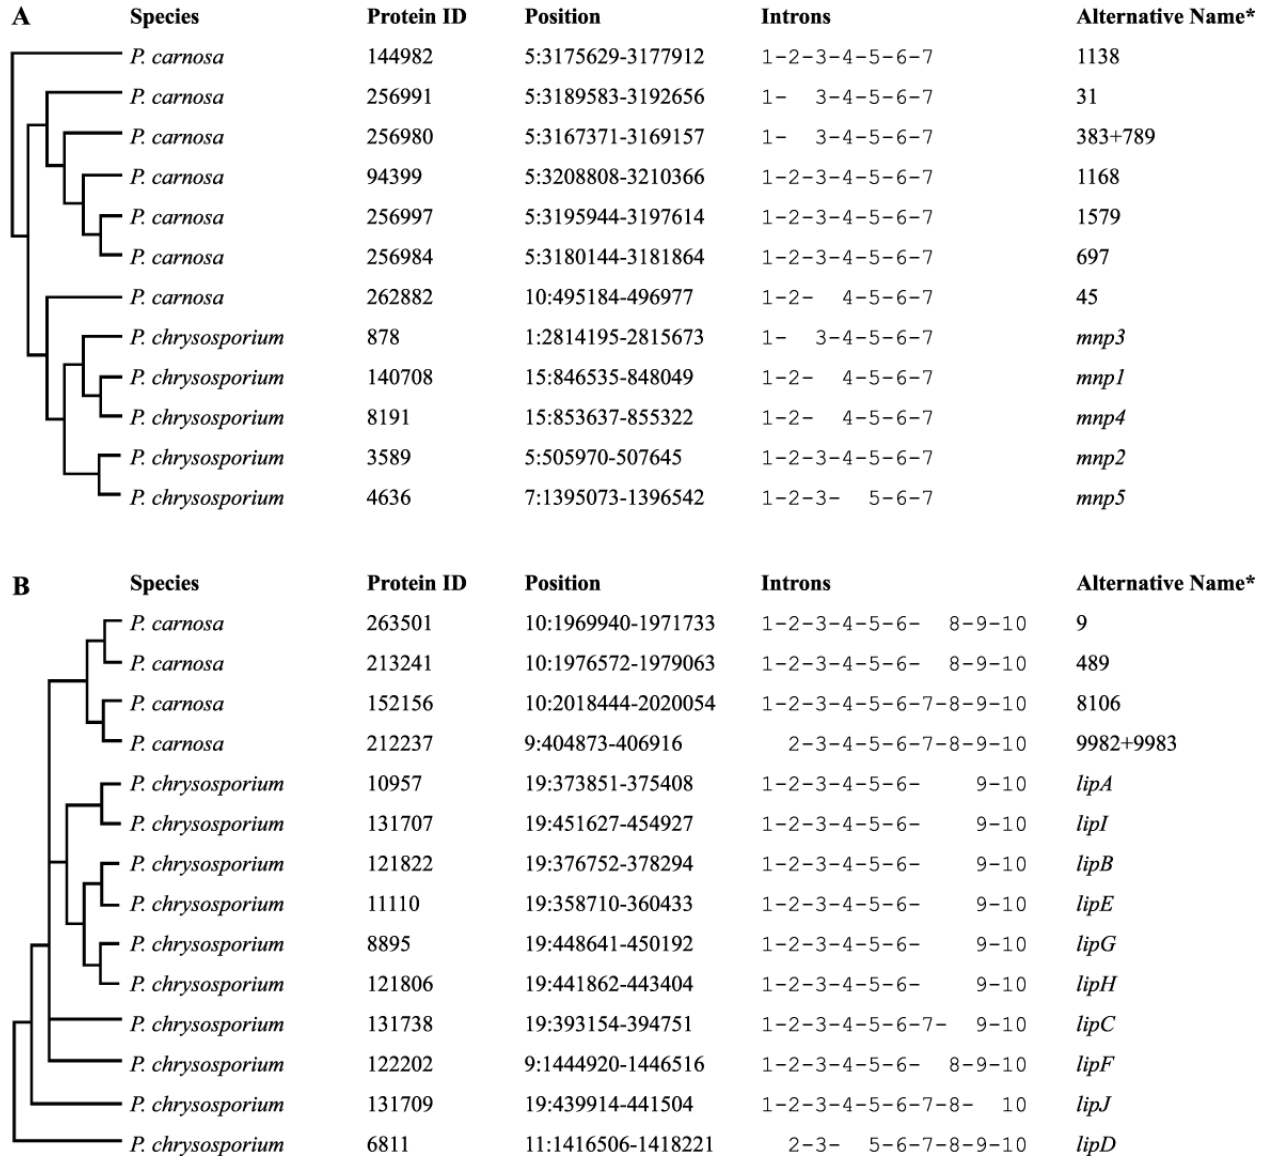

**Fig. S5. Phylogeny, genome position, and intron distribution of genes encoding manganese peroxidases and lignin peroxidases.**

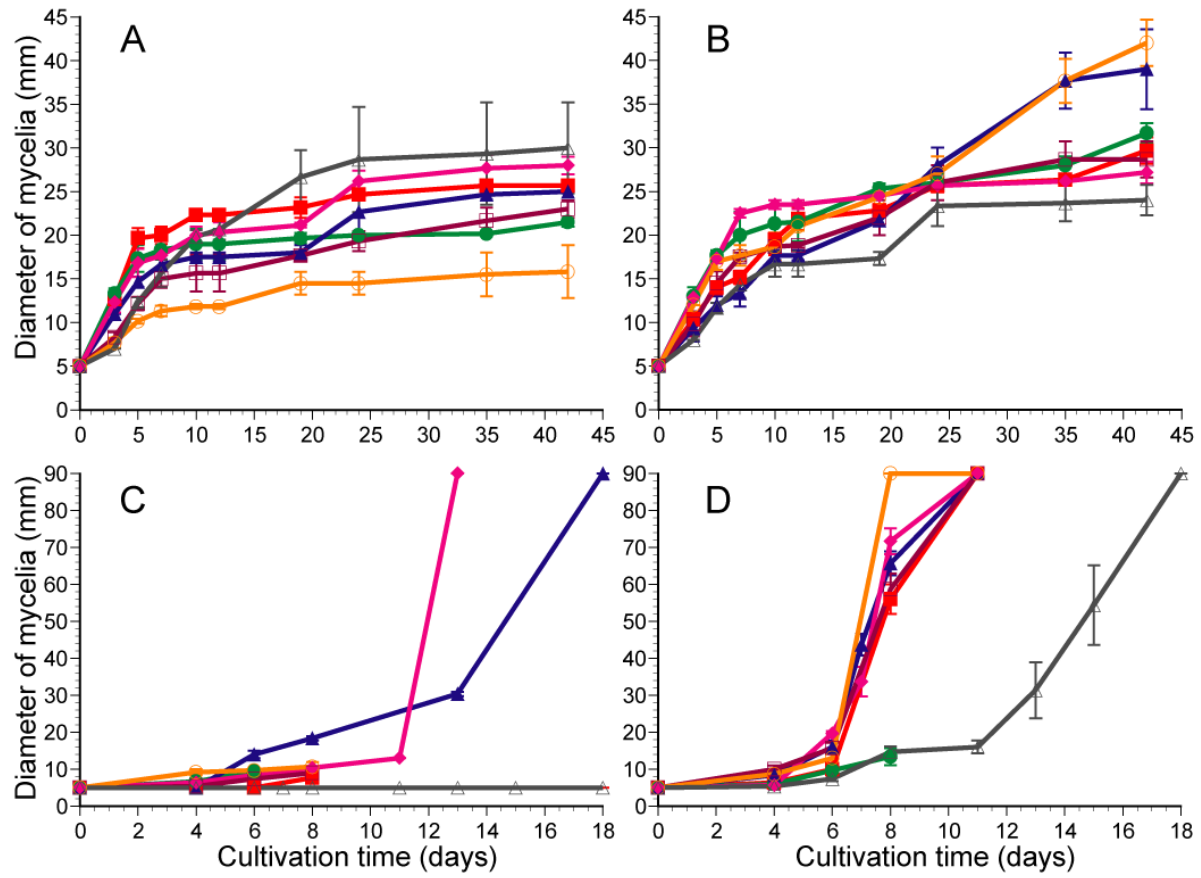

**Fig. S6. Mycelial growth of *P. carnosus* and *P. chrysosporium* on different hardwood and softwood species.**

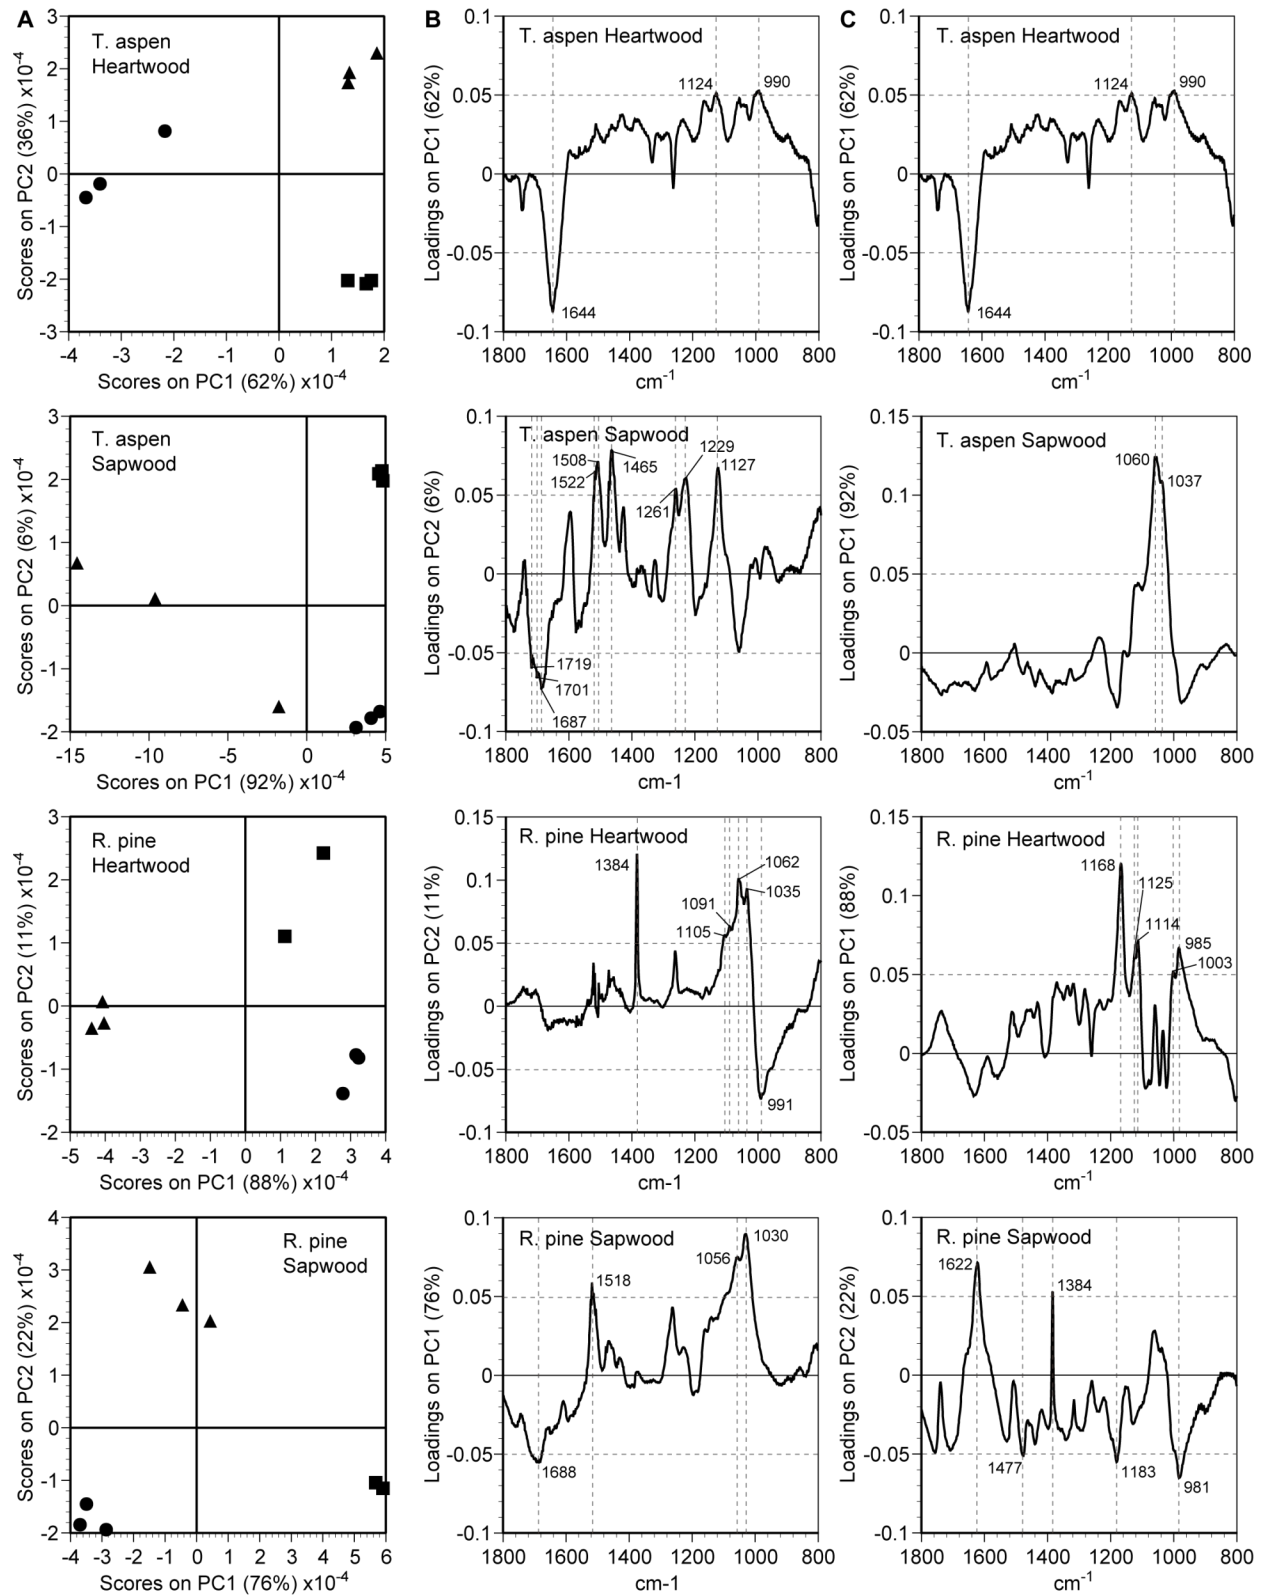

**Fig. S7. Different mode of wood decay described by FT-IR analysis.**
